# Supplementary material for: Assessing the utility of an institutional publications officer: a pilot assessment
Source: PeerJ. 2017 May 31;5:e3294. doi: 10.7717/peerj.3294 (PMC5455296; doi:10.7717/peerj.3294)
Supplement: Supplemental Information 1 [file peerj-05-3294-s001.xlsx]

## Sheet: Table 1
Table.1	Topic of researcher comsults
Researcher	Authorship	Open access	Writing (RG; Duplicate publication)	Predatory journals	Peer review	Ethics (duplicate publishing; image manipulation; permissions; trial registration)	Submission process	Other	Topic
1	1								Authorship dispute
2				1					Predatory journals
3						1			Copyright for use of scale
4			1						Writing publications
5	1	1							Author affiliaton and open access
6		1							Reporting Guideline
7								1	General inquiry about resources
8					1				Reviewer comments and general feedback
9								1	General inquiry about resources
10				1		1			Predatory journals; duplicate publication
11								1	ORCID identification
12				1	1				Responding to reviewers; predatory journals
13				1		1			Image manipulation; Predatory e-book publisher
14				1					Invite for interview at potential predatory outlet
15			1				1		Where to submit; help writing
16						1			Clinical trial registration and submission
17			1						General inquiry about resources for writing
18				1					Predatory journals and conferences
19			1						Reporting Guidelines
20			1						Quality assessment tools for surveys
21		1						1	Impact factors; resouces for open access publishing
22			1						Writing for publication
23						1			Self-plagiarism
24					1				Responding to reviewers
25			1						Copy editing
26		1							Open access fund
27								1	Funding for students to contribute to writing
28				1					Predatory chapter invitation
29			1	1					Writing tools; Predatory journals
30							1		Cover letter templates
31							1		How to select a journal for re-submission of rejected article
32		1					1		Open access and where to submit; Journal selector tools
33		1							uOttawa repository for submitting unpublished work
34		1							Open access discounts
35		1							Open access funding
36							1		Ideas of where to submit a manuscript
37			1						Protocol design and reporting
38		1							Open access funding
39				1			1		Cover letter help; Predatory journal
40							1		Submission of a rejected paper
41			1						Protocol design and reporting
42		1							Open access funding
43							1		Where to submit a rejected paper
44	1						1		Authorship dispute over submitting a paper ; reporting tables
45			1						Review of reporting quality of manuscript
46								1	General resources avaialbe that could be relevant in her new role
47					1				Query about peer-review
48		1		1					Querry about open access; Predatory journals
49								1	General query about services
50	1								Author affiliaton on manuscripts
51								1	General services available to group
52		1							Open access discounts
53		1							Open access models
54					1		1		Review of manuscript; Advice on where to submit
55		1							Open access discounts
56				1					Predatory Conference Invitation
57		1							Open access discounts
58							1		Classifying publications
59		1							viability of open access
60		1							Data sharing
61							1		writing a editor a letter in response to a published paper
62			1						Feedback on a manuscript
63				1					Predatory journal invite
64							1		measuring knowledge of research practices
65				1	1				(predatory?) rejection of paper due to revision not being submitted on time
66				1					Case report at predatory journal
Sum	4	17	12	14	6	5	13	8	79
	0.0506329	0.21519	0.151899	0.177215	0.0759494	0.0632911	0.164557	0.101266

## Sheet: Table 2 and 3 - Raw data
Table 2&3 - Raw data		*variables are described more completely below the data
		Survey 1	Survey 2	Survey 1	Survey 2	Survey 1	Survey 2	Survey 1	Survey 2	Survey 1	Survey 2	Survey 1	Survey 2	Survey 1	Survey 2	Survey 1	Survey 2	Survey 1	Survey 2	Survey 1	Survey 2	Survey 1	Survey 2	Survey 1	Survey 2	Survey 1	Survey 2	Survey 1	Survey 2
PO interaction (1=no; 2=yes)	ID	journalology1	journalology2	enablingOA1	enablingOA2	CreativeCommons1	CreativeCommons2	OAtrue1	OAtrue2	IFCalc1	IFCalc2	Waste1	Waste2	Conferences1	Conferences2	RG1	RG2	Predatory1	Predatory2	Pubbias1	Pubbias2	Thomson Reuters1	Thomson Reuters2	Findingdontagree1	Findingdontagree2	RGuseful1	RGuseful2	Redundant1	Redundant2
1	1	1	1	0	0	0	0	1	1	1	1	1	0	1	1	1	0	0	1	1	1	0	0	1	1	0	1	1	1
1	6	1	1	0	0	1	1	1	1	0	0	0	1	1	1	1	1	0	1	0	0	0	0	1	1	0	0	1	1
1	10	0	0
1	15	0	0	0	0	0	0	1	1	1	1	0	0	1	1	1	0	0	0	0	0	1	1	0	1	1	0	1	1
1	16	1	1	0	0	0	0	0	0	0	0	0	0	1	0	1	1	0	1	1	1	0	1	1	1	0	1	0	0
1	17	1	1	0	0	0	0	0	0	1	0					1	1	0	0	0	1	1	0	1	1	1	1	0	1
1	21	1	1	1	1	1	1	1	1	1	1	0	0	1	1	1	1	1	1	1	0	1	1	0	1	1	1	0	1
1	22	1	1	0	0	1	1	0	0	0	1	0	0	1	0	1	1	1	1	0	1	0	0	1	1	1	1	1	1
1	23	0	0	0	0	0	0	0	0	0	0	0	0	1	1	0	1	0	0			0	0	0	1	0	0	0	1
1	24	0	0	0	0	0	0	0	0	0	0	0	0	0	0	1	1	1	1	1	1	0	0	1	1	1	1	1	0
1	25	0	0	0	0	0	0	0	0	0	0					1	1	0	0			0	0	1	1	0	0	1	1
1	32	0	0	0	0	1	1	1	1	1	0	0	1	1	1	1	1	1	1	1	1	0	0	1	1	0	1	0	1
1	33	0	0	1	0	1	1	1	1	0	1	0	0	1	0	1	1	1	1	1	1	0	0	0	0	0	1	1	1
1	34	1	1	0	0	0	1	0	1	1	1	1	1	0	1	1	1	1	1	0	0	1	1	1	1	1	0	1	1
1	35	1	1	0	0	0	1	0	0	0	1	1	0	1	1	1	1	0	1	0	0	0	1	1	0	1	1	1	1
1	36	0	0	1	1	0	1	0	1	0	0	0	0	0	0	1	1	1	0	1	1	1	1	1	1	1	1	1	1
1	37	0	0	0	0	0	0	0	0	1	0	0	0	0	0	1	1	0	0	1	1	0	1	0	1	1	1	1	1
1	39	0	0	0	0	0	0	0	0	0	0	0	0	0	0	0	0			1	1	0	0	1	1	0	0	0	1
1	44	0	0	0	0	0	0	0	0	0	0	1	0	0	0	0	0	0	0			0	0	1	0			1	0
1	47	1	1	0	0	0	0	0	0	0	1	1	0	1	0	1	0	0	0	0	0			1	0	0	0	0	0
1	48	0	0	0	0	0	0	1	1	1	0	0	0	1	1	1	0	0	0	1	1	0	0	1	1	1	0	1	1
1	49	0	0	0	0	0	0	0	0	0	0	0	1	1	1	1	1	0	0	0	1	0	0	1	1	0	0	0	0
1	50	0	0	0	0	0	0	0	0	0	1	0	0	1	0	0	1	0	0	0	1	1	1	0	1	0	1	0	0
1	51	1	1	0	0	1	1	0	0	0	0	0	0	1	1	1	1	0	1	0	1	0	0	0	0	0	1	1	1
1	52	0	0	1	0	0	0	0	0	0	1	0	0	0	1	0	1	0	0	1	1	0	0	1	1	0	0	0	1
1	54	1	1	0	0	0	0	0	0	0	0	0	0	0	1	1	1	1	1	1	0	0	0	1	1	1	0	0	1
1	62	1	1	0	0	0	0	0	1	0	0	0	1	1	1	1	1	0	0	0	1	0	1	0	1	0	0	0	0
1	63	1	1	0	1	0	0	0	0	0	0	0	0	1	1	1	1					0	0	0	1	1	0
1	66	1	1	0	0	0	0	0	0	0	0	0	1	1	1	1	1					0	1	1	1	1	0	1	1
1	67	1	1	0	0	0	0	0	0	0	0	0	0	1	1	1	1	0	0	0	0	0	0	0	0	1	1	0	1
1	68	1	1
1	70	1	1
1	71	1	1	0	0	0	0	0	0	0	0	0	0	0	1	1	1	1	1	1	1	1	1	1	0			1	1
1	75	0	0	0	0	0	0	0	0	0	0	0	0	1	1	1	1	0	0	1	1	0	0	1	1			1	1
1	78	0	0	0	0	0	1	0	0	0	0	0	0	0	1	1	1	1	1			0	0	1	1	0	0	0	0
1	79	1	1	0	0	0	0	0	0	0	0	0	0	1	0	1	1	1	1	1	1	0	0	1	1	0	0	1	1
1	80	0	0	0	0	1	1	0	0	1	0	0	0	1	1	1	1	0	0	0	0	0	0	1	0			0	1
1	82	0	0	0	1	1	1	1	1					0	1	1	1	1	1	1	1	1	1	1	0	1	1	1	1
1	83	0	0
1	84	1	1	0	0	0	0	0	0	0	1	0	0	0	1	1	1	1	1	1	0	0	0	1	0	0	0	1	1
1	88	1	1	0	0	0	0	0	0	0	0											0	0
1	91	1	1
1	96	1	1	0	0	0	0	0	0	0	1	0	0	0	0	1	1	1	0	0	1	1	1	1	0			1	0
1	98	0	0	0	0	0	0	0	0	1	1	0	0	0	0	1	1	1	1	1	0	0	0	1	0			0	1
1	101	0	0	0	0	0	0	0	0	0	0	0	0	0	0	0	0	0	1	1	0	0	0	0	0	0	0	0	1
1	102	0	0	0	0	0	0	1	1	1	1	0	0	0	1	1	1	1	1	1	0	0	1	1	0	1	1	0	1
1	104	1	1	0	0	0	0	0	1	1	1	0	0	1	1	1	1	0	0	1	1	1	0	1	0	0	0	0	1
1	106	0	0	0	0	0	0	0	1	0	0	0	0	0	0	0	1	0	0	0	1	0	0	1	1	0	0	1	1
1	108	0	0	1	1	0	0	1	1	0	1	0	0	1	1	1	1	1	0	1	1	0	1	1	1	0	0	1	1
1	114	1	1
1	115	1	1	0	0	0	1	1	1	1	1	0	0	1	1	1	1	1	1	1	1	1	0	0	1	0	0	1	1
1	116	1	1	0	0	1	0	1	0	0	0	0	0	1	1	1	1	1	1	1	1	0	0	1	1	0	0	1	1
1	119	0	0	0	0	0	0	0	1	0	0											0	0
Table 3 data:	SUM	27	27	5	5	9	13	12	17	13	17	5	6	26	28	38	38	19	22	24	26	11	15	33	30	16	16	25	35
	Total N	53	53	47	47	47	47	47	47	46	46	42	42	43	43	45	45	42	42	39	39	46	46	45	45	39	39	44	44
	Percent correct	0.509434	0.509434	0.106383	0.106383	0.191489	0.276596	0.255319	0.361702	0.282609	0.369565	0.119048	0.142857	0.604651	0.651163	0.844444	0.844444	0.452381	0.52381	0.615385	0.666667	0.23913	0.326087	0.733333	0.666667	0.410256	0.410256	0.568182	0.795455
	difference		0		0		0.0851064		0.106383		0.0869565		0.0238095		0.0465116		0		0.0714286		0.0512821		0.0869565		-0.0666667		0		0.227273
Table 2 data:	% difference		0		0		8.51064		10.6383		8.69565		2.38095		4.65116		0		7.14286		5.12821		8.69565		-6.66667		0		22.7273
2	8
2	12	0	0	0	0	0	1	0	1	1	1	0	0	1	1	1	1	0	0	1	1	1	1	1	0	1	0	1	1
2	13	1	1	0	0	0	0	0	0	1	1	0	0	0	1	1	1					0	0
2	26	1	1	0	0	0	0	1	1	0	0	0	0	0	1	1	1	0	0	1	0	0	0	1	0	0	0	1	1
2	27	0	0	0	0	0	0	1	1	1	0	0	0	1	0	1	1	0	1	1	1	1	0	1	1	1	1	1	1
2	28	0	0	0	0	0	0	0	1	0	0	1	1	1	1	1	1	0	1	1	1	0	0	0	0	0	0	1	1
2	30	1	1	0	1	1	1			1	1	0	0	0	1	1	1	0	0	0	0	0	0	0	1	1	0	1	1
2	31	1	1	0	1	0	0	0	0	1	0	0	1	0	1	1	1	0	0	1	1	0	0	1	1	1	1	1	1
2	41	0	0	0	0	1	1	1	1	1	0	0	0	1	1	1	1	1	1	1	1	1	1	1	1	0	0	1	1
2	45
2	53
2	55	1	1	0	1	1	1	1	1	1	0	1	1	1	1	1	1	1	1	0	1	1	1	1	1	1	1	1	1
2	59	1	1	1	1	0	0	1	1	1	1	0	1	0	0	1	1	1	1	1	1	0	0	0	1	0	0	1	1
2	60	1	1	0	0	1	1	0	0	1	1	1	1	1	1	1	1			1	0	1	1	1	0	1	0	1	1
2	61	0	0	0	0	0	0	0	0	0	0	0	0	1	1	1	1	0	1	0	0	0	0	1	1	0	0	1	1
2	64	1	1	0	1	1	1	1	1	1	1	0	0	1	1	0	1	1	1	1	1	1	1	1	1	0	1	1	1
2	69	0	0	1	1	0	0	0	0	0	0	0	0	0	0	1	1	0	0	1	1	0	0	1	1
2	74
2	77	1	1	0	1	1	0	0	1	1	0	0	1	0	0	1	1	0	0	1	0	0	0	1	0	0	1	1	1
2	81	1	1	0	0	0	0	1	0	1	1	0	0	0	1	1	1	1	1	0	1	1	1	1	0	1	1	1	1
2	89	1	1	0	1	0	1	1	1	1	1	0	0	1	1	1	1	1	1	1	1	1	1	1	0	1	1	1	1
2	95
2	100	1	1	0	0	0	1	0	0	1	0			1	0	1	1	1	1	1	1	0	0	1	1	1	1	1	1
2	105
2	107	1	1	0	0	0	0	1	1	1	1	0	1	1	1	1	1	0	0	0	1	0	1	1	1	1	0	1	1
2	110	1	1	1	1	1	0	0	0	0	0	0	1	0	0	0	1	1	1	1	1	1	1	1	0	1	1	1	1
2	112
2	113	1	1	1	1	0	0	0	0	0	0	0	0	0	1	1	1	0	1	1	1	0	0	1	1	1	1	1	1
Table 3 data:	SUM	15	15	4	10	7	8	9	11	15	9	3	8	11	15	19	21	8	12	15	15	9	9	17	12	12	10	19	19
	TOTAL N	21	21	21	21	21	21	20	20	21	21	20	20	21	21	21	21	19	19	20	20	21	21	20	20	19	19	19	19
	Percent correct	0.714286	0.714286	0.190476	0.47619	0.333333	0.380952	0.45	0.55	0.714286	0.428571	0.15	0.4	0.52381	0.714286	0.904762	1	0.421053	0.631579	0.75	0.75	0.428571	0.428571	0.85	0.6	0.631579	0.526316	1	1
	difference	0		0.285714		0.047619		0.1		-0.285714		0.25		0.190476		0.0952381		0.210526		0			0		-0.25		-0.105263		0
Table 2 data:	% difference	0		28.5714		4.7619		10		-28.5714		25		19.0476		9.52381		21.0526		0			0		-25		-10.5263		0
*Variable description
Variable	Item	Description
PO interaction (1=no; 2=yes)		Did the participant interact with the publications officer (1=no; 2=yes)
Journalology1; Journalology2	1	What is journalology?
enablingOA1; enablingOA2	2	Enabling free access to a research publication, for instance, through an institutional repository, is often referred to as:
CreativeCommons1; CreativeCommons2	3	What is Creative Commons?
OAtrue1; OaTrue2	4	Which of the following is true of open access publications?
IFCalc1; IFCalc2	5	How is a journal’s impact factor calculated?
Waste1; Waste2	6	Approximately how much money is estimated to be wasted annually, globally, in health research?
Conferences1;Conferences2	7	Roughly what percent of biomedical conference presentations are subsequently published as full length research articles?
RG1;RG2	8	What are reporting guidelines?
Predatory1;Predatory2	9	Which of the following is always true of predatory journals?
Pubbias1;Pubbias2	10	Which of these is not an example of publications bias?
Thomson Reuters1;Thomson Reuters2	11	Which one(s) of these impact factors includes all articles indexed in the Web of Science?
Findingdontagree1;Findingdontagree2	12	When findings from a research study do not agree with your initial hypothesis, it is acceptable/recommended to
RGuseful1;RGuseful2	13	Reporting guidelines are useful for (check all that apply):
Redundant1;Redundant2	14	A redundant publication is:

## Sheet: Table 3
		No interaction with publications officer					Interaction with publications officer
	Survey Question	N	Frequency Correct	% Correct		changein%	N	Frequency Correct	% Correct		changein%
	What is Journalology?	53	27	0.509434	50.9434	0	15	21	0.714286	71.4286	0
		53	27	0.509434	50.9434		15	21	0.714286	71.4286
	Enabling free access to a research publication, for instance, through an institutional repository, is often referred to as:	47	5	0.106383	10.6383	0	4	21	0.190476	19.0476	28.5714
		47	5	0.106383	10.6383		10	21	0.47619	47.619
	What is Creative Commons?	47	9	0.191489	19.1489	8.51064	7	21	0.333333	33.3333	4.7619
		47	13	0.276596	27.6596		8	21	0.380952	38.0952
	Which of the following is true of open access publications?	47	12	0.255319	25.5319	10.6383	9	20	0.45	45	10
		47	17	0.361702	36.1702		11	20	0.55	55
	How is a journal’s impact factor calculated?	46	13	0.282609	28.2609	8.69565	15	21	0.714286	71.4286	-28.5714
		46	17	0.369565	36.9565		9	21	0.428571	42.8571
	Approximately how much money is estimated to be wasted annually, globally, in health research?	42	5	0.119048	11.9048	2.38095	3	20	0.15	15	25
		42	6	0.142857	14.2857		8	20	0.4	40
	Roughly what percent of biomedical conference presentations are subsequently published as full length research articles?	43	26	0.604651	60.4651	4.65116	11	21	0.52381	52.381	19.0476
		43	28	0.651163	65.1163		15	21	0.714286	71.4286
		45	38	0.844444	84.4444	0	19	21	0.904762	90.4762	9.52381
	What are reporting guidelines?	45	38	0.844444	84.4444		21	21	1	100
		42	19	0.452381	45.2381	7.14286	8	19	0.421053	42.1053	21.0526
	Which of the following is always true of predatory journals?	42	22	0.52381	52.381		12	19	0.631579	63.1579
		39	24	0.615385	61.5385	5.12821	15	20	0.75	75	0
	Which of these is not an example of publications bias?	39	26	0.666667	66.6667		15	20	0.75	75
		46	11	0.23913	23.913	8.69565	9	21	0.428571	42.8571	0
	Which one(s) of these impact factors includes all articles indexed in the Web of Science?	46	15	0.326087	32.6087		9	21	0.428571	42.8571
		45	33	0.733333	73.3333	-6.66667	17	20	0.85	85	-25
	When findings from a research study do not agree with your initial hypothesis, it is acceptable/recommended to:	45	30	0.666667	66.6667		12	20	0.6	60
		39	16	0.410256	41.0256	0	12	19	0.631579	63.1579	-10.5263
	Reporting guidelines are useful for (check all that apply):	39	16	0.410256	41.0256		10	19	0.526316	52.6316
	A redundate publication is	44	25	0.568182	56.8182	22.7273	19	19	1	100
		44	35	0.795455	79.5455		19	19	1	100

## Sheet: Figure 1a , 1b 
	PO interaction	NO		PO interaction	YES
	mean	SE		mean	SE
rg	1.06977	0.340014	rg	0.130435	0.334477
write	0.235294	0.16707	write	0.291667	0.212637
oa	0.372549	0.191917	oa	0.375	0.267926
plagiarism	-0.176471	0.150048	plagiarism	-2.65991e-17	0.225221
predatory	0.901961	0.206283	predatory	0.291667	0.258754
publication ethics	-0.156863	0.166563	publication ethics	0.166667	0.166667
										YES

## Sheet: Raw data Figure 1
Figure 1. Raw data		*variables are described more completely below the data
PO interaction (1=no; 2=yes)	ID	rg1	rg2	write1	write2	oa1	oa2	plagiarism1	plagiarism2	predatory1	predatory2	publicationethics1	publicationethics2
1	1			6	7	1	3	7	5	5	5	5	7
1	6	3	7	6	7	5	6	5	6	1	5	6	6
1	10
1	15	7	4	7	7	7	7	4	4	1	2	7	5
1	16	5	7	3	5	2	4	4	5	4	5	5	5
1	17	7	7	6	5	3	4	6	5	2	3	4	5
1	21	6	6	4	5	6	6	5	6	6	6	6	6
1	22	4	6	4	5	4	3	6	5	3	5	6	6
1	23	1	4	6	6	1	1	6	6	1	1	6	6
1	24	6	6	5	6	4	5	5	5	3	4	4	5
1	25	7	7	5	4	5	4	5	6	5	6	7	6
1	32	4	6	4	6	4	5	6	7	5	6	6	5
1	33	6	6	2	5	4	2	4	4	3	3	5	5
1	34	7	7	5	5	4	5	4	4	4	5	4	4
1	35	7	6	6	6	7	7	7	7	6	7	7	7
1	36	7	7	5	5	6	5	5	4	5	5	6	6
1	37	3	5	7	6	6	5	7	6	6	6	6	6
1	39			1	1	1	1	3	1	1	1	1	1
1	44	6	2	4	2	3	2	4	3	2	4	4	2
1	47	5	6	2	4	2	5	6	5	2	6	4	6
1	48			5	4	4	3	6	6	5	5	6	6
1	49			4	3	4	3	4	3	4	3	6	4
1	50	4	6	6	6	6	6	6	6	6	6	6	6
1	51	2	6	6	5	3	4	6	6	5	6	6	6
1	52	7	6	5	2	1	1	7	7	1	2	4	2
1	54			3	3	1	1	5	6	1	3	4	4
1	62	6	4	7	6	6	4	7	6	7	6	7	6
1	63	2	7	1	4	1	4	6	4	2	4	4	5
1	66	5	6	6	6	6	5	7	5	3	5	7	6
1	67			3	5	2	4	6	6	2	5	2	4
1	68	7	7	6	7	5	4	7	7	3	2	7	7
1	70			2	2	1	2	5	6	2	4	2	4
1	71	1	7	7	7	5	5	7	7	6	6	4	6
1	75	7	5	1	2	1	1	6	4	5	2	4	2
1	78	7	7	6	5	6	5	6	6	5	6	6	6
1	79	2	4	2	4	2	4	3	4	4	5	4	5
1	80	5	7	6	6	5	4	5	5	6	7	5	5
1	82	5	7	6	7	6	7	6	7	6	7	6	5
1	83	7	7	5	5	5	6	5	6	3	7	7	4
1	84	6	6	6	5	5	5	7	7	7	7	7	7
1	88	7	7	7	7	3	7	7	7	5	7	7	7
1	91
1	96	4	4	6	6	5	6	6	6	6	6	6	6
1	98	1	4	4	5	2	5	6	5	4	5	6	5
1	101	1	7	1	2	1	1	4	4	1	2	4	2
1	102	2	2	5	5	5	5	4	5	3	4	6	5
1	104	5	6	7	7	7	6	3	5	7	7	5	6
1	106			1	1	1	2	4	3	3	2	4	2
1	108	7	7	7	6	7	6	7	7	7	6	7	6
1	114	5	7	6	7	3	5	7	7	2	7	6	7
1	115	1	7	7	7	5	7	5	7	7	7	7	7
1	116	7	7	6	5	4	3	6	3	4	4	5	6
1	119	3	4	4	5	4	5	7	6	3	6	6	6
Average		4.81395	5.88372	4.7451	4.98039	3.86275	4.23529	5.52941	5.35294	3.92157	4.82353	5.33333	5.17647
Difference			1.06977		0.235294		0.372549		-0.176471		0.901961		-0.156863
N		43	43	51	51	51	51	51	51	51	51	51	51
2	8	6	6	3	5	5	4	6	6	5	5	5	6
2	12	5	7	5	5	2	2	6	7	2	2	6	5
2	13	7	7	7	7	1	1	4	7	7	7	7	7
2	26	7	6	7	7	3	5	6	7	2	5	6	7
2	27	5	5	5	5	5	4	6	6	6	6	6	5
2	28	6	6	6	7	4	4	7	6	6	6	6	6
2	30	6	3	7	6	5	5	7	6	7	7	7	6
2	31	5	7	3	5	3	6	6	6	6	6	6	6
2	41	7	7	7	6	6	7	6	7	7	7	7	7
2	45
2	53	6	7	4	6	6	6	6	6	6	6	6	6
2	55	7	7	6	6	4	6	7	7	5	6	6	7
2	59	5	6	6	5	6	4	5	4	5	6	4	5
2	60	3	4	6	6	6	5	5	5	6	6	3	3
2	61	1	1	3	4	3	4	4	6	1	5	4	6
2	64	4	6	6	6	6	6	5	6	6	6	5	6
2	69	6	1	6	5	6	5	7	5	6	3	6	5
2	74
2	77	5	7	5	6	5	6	6	6	6	7	6	7
2	81	4	3	6	7	6	5	7	6	7	7	7	7
2	89	5	6	7	6	6	7	7	7	6	6	6	6
2	95
2	100	7	7	6	6	4	4	7	6	7	7	7	6
2	105
2	107	6	7	4	5	5	7	7	6	7	7	6	6
2	110	6	6	6	5	5	5	6	6	6	6	5	5
2	112			2	4	3	3	7	6	7	6	6	6
2	113	7	7	5	5	2	5	7	7	5	6	6	7
Average		5.47826	5.6087	5.33333	5.625	4.45833	4.83333	6.125	6.125	5.58333	5.875	5.79167	5.95833
Difference			0.130435		0.291667		0.375		0		0.291667		0.166667
N		23	23	24	24	24	24	24	24	24	24	24	24
*description of variables
Variable		Description
PO interaction (1=no; 2=yes)		Did the participant interact with the publications officer (1=no; 2=yes)
RG1;RG2		In the future, I will consult a reporting guideline whenever I draft a paper
Write1; Write2		I am confident in my ability to write a complete fit for purpose paper that is clearly reported and useable
oa1; oa2		I am confident in my knowledge of the various options for open access publishing
plagiarism1;plagiarism2		I am confident in my understanding of plagiarism, including self-plagiarism
predatory1; predatory2		I know what a predatory journal is and I am confident that I could identify one
publicationethics1; publicationethics2		I am confident in my understanding of publication ethics
